# Supplementary material
Source: PubMed Central journal article supplement (PMC3296235)
Supplement: NIHMS132669-supplement-Appendix.pdf [file NIHMS132669-supplement-Appendix.pdf]

|                                                                                                                                                                                           |                                                                        |                                                                                                                                       |                                                                                                                                                                                                       |                           |
|-------------------------------------------------------------------------------------------------------------------------------------------------------------------------------------------|------------------------------------------------------------------------|---------------------------------------------------------------------------------------------------------------------------------------|-------------------------------------------------------------------------------------------------------------------------------------------------------------------------------------------------------|---------------------------|
| <b>Document #</b>                                                                                                                                                                         | CRR                                                                    | MR                                                                                                                                    | IRB                                                                                                                                                                                                   |                           |
| <b>RADAR IRB STUDY</b>                                                                                                                                                                    | DRUG: Imatinib Mesylate                                                |                                                                                                                                       |                                                                                                                                                                                                       |                           |
| <b>Data Source</b>                                                                                                                                                                        |                                                                        |                                                                                                                                       |                                                                                                                                                                                                       |                           |
| <input type="checkbox"/> IRB SAE Form<br><input type="checkbox"/> Medwatch Form sent to IRB<br><input type="checkbox"/> NCI SAE form sent to IRB<br><input type="checkbox"/> Sponsor Form | <input type="checkbox"/> Cancer Center Clinical Trial Database (NOTIS) | <input type="checkbox"/> Clinical Trial Case Report Form<br><input type="checkbox"/> Local Mirror of report sent to cooperative group | Medical Record<br><input type="checkbox"/> Patient Chart<br><input type="checkbox"/> Imaging study report<br><input type="checkbox"/> Pathology report<br><input type="checkbox"/> Clinical chemistry |                           |
| <b>Protocol</b>                                                                                                                                                                           |                                                                        |                                                                                                                                       |                                                                                                                                                                                                       |                           |
| <i>Protocol name</i>                                                                                                                                                                      | <i>Protocol number</i>                                                 |                                                                                                                                       | <i>Sponsor</i>                                                                                                                                                                                        |                           |
|                                                                                                                                                                                           |                                                                        |                                                                                                                                       |                                                                                                                                                                                                       |                           |
| <b>Report Dates:</b>                                                                                                                                                                      |                                                                        |                                                                                                                                       |                                                                                                                                                                                                       |                           |
| <i>To PI</i>                                                                                                                                                                              | To IRB                                                                 | To Sponsor                                                                                                                            | <i>To FDA</i>                                                                                                                                                                                         | <i>SAE Report Numbers</i> |
| YYYY-MM-DD                                                                                                                                                                                | YYYY-MM-DD                                                             | YYYY-MM-DD                                                                                                                            | YYYY-MM-DD                                                                                                                                                                                            |                           |
| <b>Demographic</b>                                                                                                                                                                        |                                                                        |                                                                                                                                       |                                                                                                                                                                                                       |                           |
| Sex<br>M <input type="checkbox"/> F <input type="checkbox"/>                                                                                                                              | <i>Age (years)</i>                                                     | Weight (kg)                                                                                                                           | <i>Height (cm)</i>                                                                                                                                                                                    |                           |
| <b>Disease</b>                                                                                                                                                                            |                                                                        |                                                                                                                                       |                                                                                                                                                                                                       |                           |
| <b>Tumor Type</b>                                                                                                                                                                         | <b>Stage</b>                                                           | <b>Recurrence</b><br><input type="checkbox"/> Yes <input type="checkbox"/> No                                                         | <b>Tumor Burden</b>                                                                                                                                                                                   |                           |
| <b>Drug Administration</b>                                                                                                                                                                |                                                                        |                                                                                                                                       |                                                                                                                                                                                                       |                           |
| <b>Drug</b>                                                                                                                                                                               | <b>Start date / Restart</b>                                            | <b>Stop Date</b>                                                                                                                      | <b>Doses</b>                                                                                                                                                                                          |                           |
| Imatinib Meylate                                                                                                                                                                          |                                                                        |                                                                                                                                       |                                                                                                                                                                                                       |                           |
|                                                                                                                                                                                           |                                                                        |                                                                                                                                       |                                                                                                                                                                                                       |                           |
|                                                                                                                                                                                           |                                                                        |                                                                                                                                       |                                                                                                                                                                                                       |                           |
| Other Chemotherapy                                                                                                                                                                        |                                                                        |                                                                                                                                       |                                                                                                                                                                                                       |                           |
|                                                                                                                                                                                           |                                                                        |                                                                                                                                       |                                                                                                                                                                                                       |                           |
|                                                                                                                                                                                           |                                                                        |                                                                                                                                       |                                                                                                                                                                                                       |                           |
| Prednisone                                                                                                                                                                                |                                                                        |                                                                                                                                       |                                                                                                                                                                                                       |                           |
| Methylprednisolone                                                                                                                                                                        |                                                                        |                                                                                                                                       |                                                                                                                                                                                                       |                           |
| Other glucocorticosteroid                                                                                                                                                                 |                                                                        |                                                                                                                                       |                                                                                                                                                                                                       |                           |
| Furosemide                                                                                                                                                                                |                                                                        |                                                                                                                                       |                                                                                                                                                                                                       |                           |
| Torseamide                                                                                                                                                                                |                                                                        |                                                                                                                                       |                                                                                                                                                                                                       |                           |
| Other Diuretic                                                                                                                                                                            |                                                                        |                                                                                                                                       |                                                                                                                                                                                                       |                           |
|                                                                                                                                                                                           |                                                                        |                                                                                                                                       |                                                                                                                                                                                                       |                           |
| Other drugs                                                                                                                                                                               |                                                                        |                                                                                                                                       |                                                                                                                                                                                                       |                           |
|                                                                                                                                                                                           |                                                                        |                                                                                                                                       |                                                                                                                                                                                                       |                           |
|                                                                                                                                                                                           |                                                                        |                                                                                                                                       |                                                                                                                                                                                                       |                           |
|                                                                                                                                                                                           |                                                                        |                                                                                                                                       |                                                                                                                                                                                                       |                           |

|             |         |       |       |
|-------------|---------|-------|-------|
| Event date: | _____   | _____ | _____ |
|             | Y Y Y Y | M M   | D D   |
| Event time: | _____   | _____ |       |
|             | H H     | M M   |       |

|                      |                   |                                                                                                                                                                              |                                                                                                                                                                                                                                                                                                                                                                                                                                                                                 |
|----------------------|-------------------|------------------------------------------------------------------------------------------------------------------------------------------------------------------------------|---------------------------------------------------------------------------------------------------------------------------------------------------------------------------------------------------------------------------------------------------------------------------------------------------------------------------------------------------------------------------------------------------------------------------------------------------------------------------------|
| <b>Heart Failure</b> | Heart Failure     | <input type="checkbox"/> YES                                                                                                                                                 | <input type="checkbox"/> NO                                                                                                                                                                                                                                                                                                                                                                                                                                                     |
|                      | Signs / symptoms: | <input type="checkbox"/> Tachycardia > 90<br><input type="checkbox"/> Bradycardia < 50<br><input type="checkbox"/> Heart Palpitations<br><input type="checkbox"/> Chest Pain | <input type="checkbox"/> Weight Gain >2 days /<br>2 or > lbs in 1 day<br><input type="checkbox"/> Edema / Effusion<br><input type="checkbox"/> Face<br><input type="checkbox"/> Pericardial<br><input type="checkbox"/> Pulmonary<br><input type="checkbox"/> Legs<br><input type="checkbox"/> Ankles<br><input type="checkbox"/> Other _____<br><input type="checkbox"/> Dyspnea (SOB)<br><input type="checkbox"/> Clubbing of fingers<br><input type="checkbox"/> Other _____ |
|                      | Imaging studies:  | <input type="checkbox"/> Chest Radiograph                                                                                                                                    | <input type="checkbox"/> EKG <input type="checkbox"/> Echocardiogram <input type="checkbox"/> Other _____                                                                                                                                                                                                                                                                                                                                                                       |

|                 |                   |                                                                                                                          |                                                                                                                                   |
|-----------------|-------------------|--------------------------------------------------------------------------------------------------------------------------|-----------------------------------------------------------------------------------------------------------------------------------|
| <b>Fracture</b> | Fracture          | <input type="checkbox"/> YES If yes, specify:<br>_____                                                                   | <input type="checkbox"/> NO                                                                                                       |
|                 | Signs / symptoms: | <input type="checkbox"/> Bone Pain<br><input type="checkbox"/> Swelling _____<br><input type="checkbox"/> Loss of height | <input type="checkbox"/> Other _____                                                                                              |
|                 | Imaging studies:  | <input type="checkbox"/> X-ray                                                                                           | <input type="checkbox"/> Dexa scan<br>t-score _____<br><input type="checkbox"/> Bone scan<br><input type="checkbox"/> Other _____ |

|                   |                   |                                                                                                                                  |                                                                                                                                                              |
|-------------------|-------------------|----------------------------------------------------------------------------------------------------------------------------------|--------------------------------------------------------------------------------------------------------------------------------------------------------------|
| <b>Infections</b> | Infections        | <input type="checkbox"/> YES If yes, specify site and organism:<br>_____                                                         | <input type="checkbox"/> NO                                                                                                                                  |
|                   | Signs / symptoms: | <input type="checkbox"/> ANC > 2.0 x 10 <sup>9</sup><br><input type="checkbox"/> ANC < 1.0 x 10 <sup>9</sup>                     | <input type="checkbox"/> Fever > 38.5 C<br><input type="checkbox"/> Shock, severe acidosis (pH < 7.0), organ failure<br><input type="checkbox"/> Other _____ |
|                   | Labs              | <input type="checkbox"/> Blood Work<br><input type="checkbox"/> Blood Cultures _____                                             | <input type="checkbox"/> Other Cultures:<br><input type="checkbox"/> Other _____                                                                             |
|                   | Treatment         | <input type="checkbox"/> IV antibiotic, antiviral or antifungals<br><input type="checkbox"/> Operation or IV radiology procedure |                                                                                                                                                              |

Other events:

**Causality**

|                                                                                                                 |                              |                             |                                  |
|-----------------------------------------------------------------------------------------------------------------|------------------------------|-----------------------------|----------------------------------|
| (Naranjo 2) Did the adverse event appear after the drug was administered?                                       | YES <input type="checkbox"/> | NO <input type="checkbox"/> | UNKNOWN <input type="checkbox"/> |
| (Naranjo 3) Did the symptoms or signs of the event improve after administration of an agent to treat the event? | YES <input type="checkbox"/> | NO <input type="checkbox"/> | UNKNOWN <input type="checkbox"/> |
| (Naranjo 4) Did additional events occur with readministration of gefitinib?                                     | YES <input type="checkbox"/> | NO <input type="checkbox"/> | UNKNOWN <input type="checkbox"/> |
| Were alternative events mentioned in the medical records or by the P.I? If so, please specify: _____<br>_____   | YES <input type="checkbox"/> | NO <input type="checkbox"/> | UNKNOWN <input type="checkbox"/> |
| (Naranjo 5) Are there alternative causes (other than gefitinib) that could have on their own caused the event?  |                              |                             |                                  |
| (Naranjo 9) Did the patient have the event with previous administration of gefitinib or similar drugs?          | YES <input type="checkbox"/> | NO <input type="checkbox"/> | UNKNOWN <input type="checkbox"/> |

**Action**

|                                                                     |                              |                             |
|---------------------------------------------------------------------|------------------------------|-----------------------------|
| Changes to <b>protocol</b> based at least in part on this event     | YES <input type="checkbox"/> | NO <input type="checkbox"/> |
| Changes to <b>consent form</b> based at least in part on this event | YES <input type="checkbox"/> | NO <input type="checkbox"/> |

**Outcome:**

|                                                                   |                                                                                                                 |                             |
|-------------------------------------------------------------------|-----------------------------------------------------------------------------------------------------------------|-----------------------------|
| Imatinib Mesylate discontinued?                                   | YES <input type="checkbox"/>                                                                                    | NO <input type="checkbox"/> |
| Agent to treat signs and symptoms Heart Failure/Edema drug given? | YES <input type="checkbox"/> If yes, specify<br>Drug(s) _____<br>Date(s) _____<br>Dose _____<br>Frequency _____ | NO <input type="checkbox"/> |
| Agent to treat signs and symptoms of a Fracture?                  | YES <input type="checkbox"/> If yes, specify<br>Drug(s) _____<br>Date(s) _____<br>Dose _____<br>Frequency _____ | NO <input type="checkbox"/> |
| Agent to treat signs and symptoms of Infection?                   | YES <input type="checkbox"/> If yes, specify<br>Drug(s) _____<br>Date(s) _____<br>Dose _____<br>Frequency _____ | NO <input type="checkbox"/> |

|                |                                                                                                                                                                                                    |          |
|----------------|----------------------------------------------------------------------------------------------------------------------------------------------------------------------------------------------------|----------|
| PI Assessment: | <input type="checkbox"/> Probably Related <input type="checkbox"/> Definitely Related<br><input type="checkbox"/> Possibly Related <input type="checkbox"/> Unrelated <input type="checkbox"/> N/A | Comment: |
|----------------|----------------------------------------------------------------------------------------------------------------------------------------------------------------------------------------------------|----------|

|                         |  |
|-------------------------|--|
| <b>Data extraction:</b> |  |
| Start time:             |  |
| Stop time:              |  |
| Initials:               |  |
